# Supplementary material for: Could Immune Checkpoint Disorders and EBV Reactivation Be Connected in the Development of Hematological Malignancies in Immunodeficient Patients?
Source: MDPI journal article supplement (doi:10.3390/cancers15194786), 2023-09-29
Supplement: s1 [file s1]

## Supplementary Materials

**Table S1.** Statistical analysis of the concentration of antibodies against specific EBV antigens in the serum of patients with CLL and CVID, taking into account EBV reactivation in relation to HV

| Antibody serum concentration [U/ml] |     | CLL               |                               |                   |                              | CVID              |                               |                   |                               | Healthy volunteer |                              | p-<br>vale | p-value    |         |            |            |
|-------------------------------------|-----|-------------------|-------------------------------|-------------------|------------------------------|-------------------|-------------------------------|-------------------|-------------------------------|-------------------|------------------------------|------------|------------|---------|------------|------------|
|                                     |     | EBV+<br>(group 1) |                               | EBV-<br>(group 2) |                              | EBV+<br>(group 3) |                               | EBV-<br>(group 4) |                               | EBV-<br>(group 5) |                              |            | 1 vs.<br>5 | 2 vs. 5 | 3 vs.<br>5 | 4 vs.<br>5 |
|                                     |     | Mean±SD           | Median<br>(Range)             | Mean±SD           | Median<br>(Range)            | Mean±SD           | Median<br>(Range)             | Mean±SD           | Median<br>(Range)             | Mean±SD           | Median<br>(Range)            |            |            |         |            |            |
| Anti-EBV EA                         | IgA | 59.10±<br>10.19   | 61.86<br>(40.21-<br>73.83)    | 3.30± 1.19        | 3.50<br>(1.21-<br>4.96)      | 45.52±<br>11.51   | 43.89<br>(30.98-<br>69.49)    | 4.82± 1.11        | 4.61<br>(3.07-<br>6.70)       | 4.84± 1.41        | 5.10<br>(2.29-<br>6.96)      | 0.000*     | 0.000*     | 0.0001* | 0.000*     | 0,775      |
|                                     | IgM | 5.77 ±1.81        | 5.78<br>(3.15-<br>8.72)       | 4.87± 1.30        | 5.02<br>(2.21-<br>6.77)      | 6.35± 2.48        | 6.49<br>(2.06-<br>9.74)       | 4.86± 0.51        | 4.75<br>(4.06-<br>5.85)       | 4.96± 1.03        | 4.82<br>(3.15-<br>6.98)      | 0.000*     | 0.000*     | 0.869   | 0.016*     | 0.639      |
|                                     | IgG | 93.32±<br>15.98   | 91.95<br>(63.77-<br>119.75)   | 5.24± 1.11        | 5.07<br>(3.09-<br>6.97)      | 70.82±<br>12.88   | 71.62<br>(52.58-<br>91.21)    | 4.26± 1.05        | 4.32<br>(2.20-<br>5.95)       | 3.72± 1.20        | 3.35<br>(2.16-<br>5.96)      | 0.000*     | 0.000*     | 0.000*  | 0.000*     | 0.118      |
| Anti-EBV VCA                        | IgA | 22.98±<br>5.23    | 23.11<br>(13.84-<br>31.13)    | 5.75± 1.48        | 6.34<br>(3.03-<br>7.88)      | 16.71±<br>2.77    | 16.69<br>(12.50-<br>21.93)    | 3.01± 1.08        | 3.04<br>(1.05-<br>4.91)       | 4.93± 1.08        | 4.92<br>(3.07-<br>6.80)      | 0.000*     | 0.000*     | 0.002*  | 0.000*     | 0.000*     |
|                                     | IgM | 45.46±<br>6.98    | 43.87<br>(33.73-<br>58.09)    | 5.89± 1.29        | 5.95<br>(4.11-<br>7.59)      | 42.19±<br>9.59    | 43.31<br>(26.01-<br>56.58)    | 4.58± 1.67        | 4.48<br>(2.22-<br>6.96)       | 5.33± 1.88        | 5.19<br>(2.19-<br>8.83)      | 0.000*     | 0.000*     | 0.286   | 0.000*     | 0.157      |
|                                     | IgG | 219.64±<br>22.14  | 219.51<br>(185.99-<br>255.95) | 139.19±<br>32.30  | 138.74<br>(94.93-<br>199.21) | 172.62±<br>29.08  | 170.33<br>(130.57-<br>222.41) | 155.22±<br>23.27  | 160.77<br>(113.07-<br>189.16) | 109.50<br>±22.37  | 111.28<br>(75.07-<br>151.11) | 0.000*     | 0.000*     | 0.000*  | 0.000*     | 0.000*     |
| Anti-EBV EBNA-1                     | IgA | 16.30±<br>1.70    | 16.51<br>(13.01-<br>18.77)    | 5.04± 0.55        | 4.95<br>(4.33-<br>5.95)      | 13.81±<br>1.15    | 13.79<br>(12.03-<br>15.87)    | 2.90± 0.99        | 3.25<br>(1.02-<br>4.62)       | 3.36± 1.33        | 3.20<br>(1.22-<br>5.77)      | 0.000*     | 0.000*     | 0.000*  | 0.000*     | 0.289      |
|                                     | IgM | 7.84± 1.54        | 7.76<br>(5.13-<br>10.54)      | 6.41± 1.05        | 6.53<br>(4.21-<br>7.98)      | 7.13± 2.45        | 7.27<br>(2.73-<br>10.63)      | 3.97± 1.01        | 4.12<br>(2.47-<br>5.66)       | 5.12± 1.37        | 4.88<br>(3.14-<br>7.96)      | 0.000*     | 0.000*     | 0.000*  | 0.000*     | 0.006*     |
|                                     | IgG | 242.84<br>±29.34  | 249.15<br>(194.57-<br>294.76) | 60.66±<br>12.75   | 60.91<br>(41.42-<br>78.80)   | 235.62<br>±16.08  | 240.70<br>(207.77-<br>259.26) | 67.27±<br>6.98    | 67.26<br>(52.78-<br>79.56)    | 61.46±<br>9.94    | 59.40<br>(45.62-<br>78.50)   | 0.000*     | 0.000*     | 0.762   | 0.000*     | 0.039*     |

**Table S2.** Statistical analysis of selected parameters of the morphology and biochemistry of peripheral blood of patients with CLL and CVID, including EBV reactivation in relation to HV

| Parameter | CLL               |                               |                   |                               | CVID              |                              |                   |                               | HV                |                               | p-value | p-value    |            |            |            |
|-----------|-------------------|-------------------------------|-------------------|-------------------------------|-------------------|------------------------------|-------------------|-------------------------------|-------------------|-------------------------------|---------|------------|------------|------------|------------|
|           | EBV+<br>(group 1) |                               | EBV+<br>(group 2) |                               | EBV+<br>(group 3) |                              | EBV-<br>(group 4) |                               | EBV-<br>(group 5) |                               |         | 1 vs.<br>5 | 2 vs.<br>5 | 3 vs.<br>5 | 4 vs.<br>5 |
|           | Mean±SD           | Median<br>(Range)             | Mean±SD           | Median<br>(Range)             | Mean±SD           | Median<br>(Range)            | Mean±SD           | Median<br>(Range)             | Mean±SD           | Median<br>(Range)             |         |            |            |            |            |
| WBC       | 28.38±<br>4.22    | 28.57<br>(20.50-<br>36.21)    | 26.00±<br>2.95    | 25.07<br>(22.23-<br>32.38)    | 5.94± 0.53        | 6.00<br>(5.04-<br>6.98)      | 6.44± 0.79        | 6.20<br>(5.37-<br>7.73)       | 5.02± 0.43        | 4.97<br>(4.28-<br>5.82)       | 0.000*  | 0.000*     | 0.000*     | 0.000*     | 0.000*     |
| LYM       | 27.33±<br>4.96    | 27.65<br>(19.35-<br>36.21)    | 19.91±<br>7.23    | 21.10<br>(5.88-<br>29.09)     | 1.18± 0.73        | 1.01<br>(0.09-<br>2.88)      | 1.56± 0.69        | 1.53<br>(0.33-<br>2.86)       | 2.09± 0.50        | 2.14<br>(1.03-<br>2.94)       | 0.000*  | 0.000*     | 0.000*     | 0.000*     | 0,007*     |
| MON       | 1.16± 0.59        | 1.24<br>(0.02-<br>1.97)       | 0.54± 0.29        | 0.52<br>(0.10-<br>0.98)       | 0.51± 0.29        | 0.50<br>(0.01-<br>0.98)      | 0.83± 0.43        | 0.90<br>(0.01-<br>1.54)       | 0.63± 0.25        | 0.65<br>(0.14-<br>0.95)       | 0.000*  | 0,534      | 0,294      | 0,159      | 0,052      |
| NEU       | 2.51± 0.87        | 2.48<br>(1.06-<br>3.93)       | 2.24± 0.88        | 2.06<br>(1.12-<br>385)        | 0.96± 0.60        | 0.91<br>(0.03-<br>2.00)      | 1.02± 0.60        | 0.97<br>(0.03-<br>1.97)       | 2.63± 0.99        | 2.49<br>(1.10-<br>3.99)       | 0.000*  | 0,000*     | 0,119      | 0,000*     | 0,000*     |
| RBC       | 3.22± 0.54        | 3.44<br>(2.01-<br>3.98)       | 3.44± 0.88        | 3.37<br>(20.6-<br>4.94)       | 2.89± 0.54        | 2.92<br>(2.06-<br>3.97)      | 3.07± 0.59        | 3.18<br>(1.67-<br>3.99)       | 4.78± 0.90        | 4.91<br>(3.10-<br>6.02)       | 0.000*  | 0.000*     | 0.000*     | 0.000*     | 0.000*     |
| HGB       | 9.08± 1.33        | 9.27<br>(7.01-<br>10.99)      | 10.49±<br>1.46    | 10.30<br>(8.06-<br>12.72)     | 9.06± 0.59        | 9.02<br>(8.07-<br>9.98)      | 10.15±<br>1.17    | 10.53<br>(8.25-<br>11.77)     | 13.96±<br>1.42    | 14.44<br>(11.08-<br>15.95)    | 0.000*  | 0.000*     | 0.000*     | 0.000*     | 0.000*     |
| PLT       | 130.36<br>±11.21  | 131.04<br>(111.68-<br>147.84) | 159.31±<br>22.24  | 166.06<br>(121.23-<br>187.19) | 108.70±<br>12.03  | 109.15<br>(87.00-<br>127.39) | 134.57±<br>7.86   | 131.91<br>(123.49-<br>147.92) | 280.04<br>±69.73  | 304.53<br>(143.11-<br>378.16) | 0.000*  | 0.000*     | 0.000*     | 0.000*     | 0.000*     |
| IgG       | 6.01± 1.72        | 6.22<br>(3.10-<br>8.80)       | 5.87± 1.10        | 5.76<br>(4.10-<br>7.97)       | 2.42± 0.88        | 2.23<br>(1.08-<br>3.80)      | 3.72± 1.15        | 3.49<br>(2.09-<br>5.87)       | 11.49±<br>2.66    | 11.41<br>(7.24-<br>15.69)     | 0.000*  | 0.000*     | 0.000*     | 0.000*     | 0.000*     |
| IgM       | 2.03± 1.22        | 1.91<br>(0.10-<br>3.95)       | 0.96± 0.63        | 0.95<br>(0.01-<br>1.99)       | 1.13± 0.49        | 1.07<br>(0.18-<br>1.94)      | 1.04± 0.57        | 1.12<br>(0.25-<br>1.95)       | 2.11± 0.57        | 2.02<br>(1.12-<br>2.95)       | 0.000*  | 0.595      | 0.000*     | 0.000*     | 0.000*     |
| IgA       | 0.48± 0.23        | 0.50<br>(0.09-<br>0.98)       | 0.48± 0.25        | 0.50<br>(0.06-<br>0.83)       | 0.58± 0.25        | 0.54<br>(0.06-<br>1.00)      | 0.52± 0.31        | 0.56<br>(0.02-<br>0.96)       | 2.85± 0.95        | 3.19<br>(1.02-<br>3.97)       | 0.000*  | 0.000*     | 0.000*     | 0.000*     | 0.000*     |

**Table S3.** Statistical analysis of selected peripheral blood immunophenotype parameters of patients with CLL and CVID, including EBV reactivation in relation to HV

| Parameter          | CLI               |                            |                   |                            | CVID              |                            |                   |                            | HV                |                            | p-vale  | p-value    |            |            |            |
|--------------------|-------------------|----------------------------|-------------------|----------------------------|-------------------|----------------------------|-------------------|----------------------------|-------------------|----------------------------|---------|------------|------------|------------|------------|
|                    | EBV+<br>(group 1) |                            | EBV-<br>(group 2) |                            | EBV+<br>(group31) |                            | EBV-<br>(group 4) |                            | EBV-<br>(group 5) |                            |         | 1 vs.<br>5 | 2 vs.<br>5 | 3 vs.<br>5 | 4 vs.<br>5 |
|                    | Mean±SD           | Median<br>(Range)          |         |            |            |            |            |
| CD45+ [%]          | 91.08±<br>4.31    | 91.35<br>(82.29-<br>97.33) | 93.09±<br>3.05    | 92.02<br>(88.50-<br>97.84) | 88.31±<br>4.93    | 87.35<br>(80.33-<br>97.12) | 88.75±<br>4.73    | 88.70<br>(80.16-<br>96.73) | 93.97±<br>2.35    | 94.38<br>(90.38-<br>97.91) | 0.000*  | 0.000*     | 0.256      | 0.000*     | 0.000*     |
| CD3+ [%]           | 23.52±<br>8.29    | 23.56<br>(10.73-<br>37.76) | 18.32±<br>4.45    | 19.47<br>(10.11-<br>25.07) | 65.45±<br>14.83   | 65.27<br>(44.27-<br>88.20) | 62.42±<br>8.84    | 61.26<br>(46.42-<br>77.87) | 78.18±<br>8.94    | 75.16<br>(65.42-<br>91.94) | 0.000*  | 0.000*     | 0.000*     | 0.000*     | 0.000*     |
| CD19+ [%]          | 68.34±<br>10.56   | 70.88<br>(43.30-<br>86.98) | 62.08±<br>8.02    | 60.43<br>(46.23-<br>75.09) | 9.86 ±2.90        | 9.76<br>(4.25-<br>14.64)   | 9.43± 4.04        | 9.50<br>(3.37-<br>16.30)   | 10.92±<br>2.92    | 10.29<br>(7.05-<br>15.88)  | 0.000*  | 0.000*     | 0.000*     | 0.328      | 0.160      |
| CD4+ [%]           | 12.55±<br>5.10    | 11.68<br>(5.45-<br>21.92)  | 9.61± 3.64        | 10.38<br>(3.31-<br>16.70)  | 32.05±<br>11.35   | 33.52<br>(12.03-<br>52.49) | 26.73±<br>8.76    | 24.73<br>(13.25-<br>39.31) | 49.93±<br>5.63    | 48.69<br>(40.00-<br>59.89) | 0.000*  | 0.000*     | 0.000*     | 0.000*     | 0.000*     |
| CD8+ [%]           | 12.07±<br>6.64    | 11.13<br>(2.19-<br>24.81)  | 10.33±<br>4.26    | 9.64<br>(4.06-<br>19.72)   | 33.41±<br>17.19   | 33.16<br>(4.65-<br>69.74)  | 33.93±<br>13.27   | 34.91<br>(10.44-<br>55.17) | 32.37±<br>9.86    | 30.50<br>(14.26-<br>47.33) | 0.000*  | 0.000*     | 0.000*     | 0.007*     | 0.490      |
| CD4+/CD8+<br>ratio | 1.66± 1.63        | 1.06<br>(0.28-<br>8.75)    | 1.09± 0.55        | 1.13<br>(0.24-<br>2.26)    | 1.69± 0.89        | 0.99<br>(0.23-<br>8.91)    | 1.03± 0.78        | 0.80<br>(0.24-<br>2.98)    | 1.73± 0.67        | 1.58<br>(0.95-<br>3.51)    | 0.0028* | 0.053      | 0.000*     | 0.020*     | 0.000*     |

Table S4. Statistical analysis of the percentage of T and B lymphocytes positively expressing the tested immunological checkpoints and their ligands in patients with CLL and CVID, including EBV reclamation against HV

| Parameter |                   | CLI               |                            |                   |                            | CVID             |                            |                   |                           | HV                |                         | p-<br>vale | p-value    |            |            |            |
|-----------|-------------------|-------------------|----------------------------|-------------------|----------------------------|------------------|----------------------------|-------------------|---------------------------|-------------------|-------------------------|------------|------------|------------|------------|------------|
|           |                   | EBV+<br>(group 1) |                            | EBV-<br>(group 2) |                            | EBV+<br>(group3) |                            | EBV+<br>(group 4) |                           | EBV-<br>(group 5) |                         |            | 1 vs.<br>5 | 2 vs.<br>5 | 3 vs.<br>5 | 4 vs.<br>5 |
|           |                   | Mean±SD           | Median<br>(Range)          | Mean±SD           | Median<br>(Range)          | Mean±SD          | Median<br>(Range)          | Mean±SD           | Median<br>(Range)         | Mean±SD           | Median<br>(Range)       |            |            |            |            |            |
| PD-1      | CD4+PD-1+         | 33.02±<br>7.88    | 31.83<br>(18.35-<br>44.70) | 14.04±<br>2.32    | 14.46<br>(10.06-<br>18.11) | 21.08±<br>2.80   | 21.12<br>(16.07-<br>25.00) | 12.62±<br>3.59    | 12.47<br>(6.96-<br>18.22) | 3.65± 1.22        | 3.80<br>(1.04-<br>5.71) | 0.000*     | 0.000*     | 0.000*     | 0.000*     |            |
|           | CD8+PD-1+         | 23.23±<br>3.99    | 24.12<br>(15.15-<br>28.78) | 8.67± 2.69        | 9.45<br>(4.09-<br>11.99)   | 27.43±<br>4.03   | 27.96<br>(20.25-<br>34.69) | 7.67± 1.34        | 8.03<br>(5.54-<br>9.55)   | 3.04± 1.20        | 3.05<br>(1.01-<br>4.88) | 0.000*     | 0.000*     | 0.000*     | 0.000*     |            |
|           | CD19+PD-1+        | 24.85±<br>6.38    | 25.73<br>(14.15-<br>35.63) | 10.63±<br>2.96    | 10.42<br>(6.38-<br>18.43)  | 13.45<br>±1.78   | 13.64<br>(1.01-<br>16.74)  | 4.67± 1.63        | 5.21<br>(2.29-<br>6.98)   | 3.69± 1.00        | 379<br>(2.08-<br>5.46)  | 0.000*     | 0.000*     | 0.000*     | 0.003*     |            |
| PD-L1     | CD4+PD-L1+        | 13.81±<br>1.55    | 13.69<br>(11.32-<br>16.62) | 7.04± 1.84        | 7.34<br>(3.05-<br>9.83)    | 10.37±<br>1.42   | 10.40<br>(8.19-<br>12.99)  | 4.81± 1.39        | 4.68<br>(2.85-<br>6.99)   | 0.89± 0.55        | 0.80<br>(0.11-<br>1.89) | 0.000*     | 0.000*     | 0.000*     | 0.000*     |            |
|           | CD8+ PD-L1+       | 14.97±<br>2.51    | 14.73<br>(10.31-<br>18.77) | 5.38± 1.91        | 4.91<br>(2.70-<br>8.75)    | 11.51±<br>3.47   | 11.89<br>(6.04-<br>16.97)  | 2.27± 0.65        | 2.13<br>(1.02-<br>3.28)   | 0.56± 0.24        | 0.54<br>(0.11-<br>0.96) | 0.000*     | 0.000*     | 0.000*     | 0.000*     |            |
|           | CD19+ PD-L1+      | 16.33±<br>2.19    | 16.07<br>(12.27-<br>19.86) | 7.23± 2.83        | 7.06<br>(3.01-<br>12.21)   | 12.66±<br>3.16   | 13.38<br>(7.13-<br>17.87)  | 4.13± 1.13        | 4.45<br>(2.17-<br>6.06)   | 1.07± 0.55        | 1.08<br>(0.12-<br>1.96) | 0.000*     | 0.000*     | 0.000*     | 0.000*     |            |
| CTLA-4    | CD4+ CTLA-<br>4+  | 23.52±<br>4.41    | 24.49<br>(16.06-<br>29.43) | 7.99± 2.08        | 8.24<br>(4.18-<br>11.93)   | 17.19±<br>4.33   | 18.48<br>(9.13-<br>24.00)  | 6.69± 1.38        | 6.66<br>(4.08-<br>8.82)   | 3.02± 0.62        | 3.02<br>(2.19-<br>3.95) | 0.000*     | 0.000*     | 0.000*     | 0.000*     |            |
|           | CD8+ CTLA-<br>4+  | 22.01±<br>3.15    | 22.07<br>(16.33-<br>26.86) | 11.00±<br>1.71    | 10.67<br>(8.65-<br>14.69)  | 27.70±<br>6.38   | 29.19<br>(18.15-<br>36.56) | 6.33± 1.28        | 6.12<br>(4.17-<br>8.61)   | 3.40± 0.77        | 3.26<br>(2.01-<br>4.72) | 0.000*     | 0.000*     | 0.000*     | 0.000*     |            |
|           | CD19+ CTLA-<br>4+ | 7.98 1.80         | 7.98<br>(5.03-<br>10.93)   | 2.31± 0.90        | 2.06<br>(1.13-<br>3.86)    | 21.85±<br>5.53   | 23.62<br>(13.15-<br>29.63) | 5.58± 1.06        | 5.52<br>(3.32-<br>7.58)   | 2.07± 0.53        | 2.09<br>(1.01-<br>2.95) | 0.000*     | 0.000*     | 0.000*     | 0.000*     |            |
| CD86      | CD4+ CD86+        | 9.25± 1.58        | 9.31<br>(7.06-<br>11.86)   | 5.15± 0.54        | 5.27<br>(4.08-<br>5.94)    | 7.42± 0.97       | 7.17<br>(6.10-<br>8.91)    | 4.91± 0.45        | 4.87<br>(4.08-<br>5.81)   | 2.86± 0.64        | 2.76<br>(2.02-<br>3.97) | 0.000*     | 0.000*     | 0.000*     | 0.000*     |            |
|           | CD8+ CD86+        | 7.03± 1.83        | 7.08                       | 4.04± 0.60        | 4.11                       | 4.89± 0.55       | 4.97                       | 2.51± 0.27        | 2.52                      | 1.91± 0.59        | 1.83                    | 0.000*     | 0.000*     | 0.000*     | 0.000*     |            |

|               |                       |                |                        |                |                        |                 |                        |                 |                        |                 |                        |        |        |        |        |        |
|---------------|-----------------------|----------------|------------------------|----------------|------------------------|-----------------|------------------------|-----------------|------------------------|-----------------|------------------------|--------|--------|--------|--------|--------|
|               |                       |                | (4.02-9.96)            |                | (3.12-4.95)            |                 | (4.01-5.71)            |                 | (2.01-2.99)            |                 | (1.05-3.00)            |        |        |        |        |        |
|               | <b>CD19+ CD86+</b>    | 47.19±<br>4.28 | 47.15<br>(40.34-52.97) | 32.71±<br>3.56 | 33.11<br>(26.11-37.81) | 28.07±<br>1.12  | 28.00<br>(26.25-29.88) | 22.52±<br>1.51  | 22.42<br>(20.05-24.93) | 13.91±<br>3.96  | 13.36<br>(8.03-20.89)  | 0.000* | 0.000* | 0.000* | 0.000* | 0.000* |
| <b>CD200R</b> | <b>CD4+CD200R+</b>    | 16.26±<br>2.88 | 16.42<br>(11.09-20.65) | 6.36± 2.06     | 5.99<br>(3.19-9.48)    | 9.25± 1.30      | 9.29<br>(7.40-11.98)   | 3.75± 1.29      | 3.73<br>(1.28-5.89)    | 4.80± 2.46      | 4.33<br>(1.21-8.99)    | 0.000* | 0.000* | 0.010* | 0.000* | 0.315  |
|               | <b>CD8+ CD200R +</b>  | 19.28±<br>3.87 | 19.96<br>(11.08-24.95) | 6.35± 2.10     | 6.50<br>(2.79-10.33)   | 14.94±3.04      | 14.78<br>(10.30-19.93) | 5.33± 2.09      | 5.40<br>(2.26-8.81)    | 4.27± 1.58      | 4.79<br>(1.35-6.88)    | 0.000* | 0.000* | 0.000* | 0.000* | 0.093  |
|               | <b>CD19+ CD200R +</b> | 21.11±<br>4.52 | 21.49<br>(14.12-27.94) | 9.42± 1.80     | 9.17<br>(6.23-11.88)   | 15.92±<br>2.18  | 15.97<br>(12.24-19.96) | 7.40± 2.26      | 7.81<br>(3.16-10.72)   | 20.71±<br>5.30  | 19.48<br>(12.76-29.42) | 0.000* | 0.803  | 0.000* | 0.000* | 0.000* |
| <b>CD200</b>  | <b>CD4+CD200+</b>     | 33.80±<br>5.16 | 34.51<br>(25.12-43.95) | 10.71±<br>3.61 | 11.02<br>(5.94-16.96)  | 21.14±<br>3.13  | 19.85<br>(16.15-27.23) | 10.30±<br>2.79  | 10.18<br>(6.24-14.73)  | 2.58± 0.85      | 2.62<br>(1.05-3.75)    | 0.000* | 0.000* | 0.000* | 0.000* | 0.000* |
|               | <b>CD8+ CD200+</b>    | 25.82±<br>3.16 | 26.13<br>(20.32-30.91) | 9.54± 2.30     | 9.96<br>(4.59-13.60)   | 24.33±<br>5.79  | 23.22<br>(15.25-33.71) | 6.94± 2.70      | 7.33<br>(3.11-10.59)   | 3.37± 1.38      | 3.62<br>(1.01-5.74)    | 0.000* | 0.000* | 0.000* | 0.000* | 0.000* |
|               | <b>CD19+ CD200+</b>   | 87.76±<br>5.26 | 87.47<br>(79.29-97.58) | 68.98±<br>3.93 | 69.12<br>(61.80-74.99) | 64.84±<br>14.22 | 61.33<br>(44.17-92.93) | 40.34±<br>11.03 | 40.58<br>(25.36-59.85) | 43.95±<br>12.81 | 41.27<br>(23.28-69.37) | 0.000* | 0.000* | 0.000* | 0.000* | 0.392  |

Table S5. Statistical analysis of serum concentrations of tested immunological checkpoints and their ligands of patients with CLL and CVID, including EBV reclamation against HV

| Serum concentration [ng/ml] | CLI               |                            |                   |                            | CVID              |                            |                   |                            | Healthy volunteer |                         | p-<br>vale | p-value    |            |            |            |
|-----------------------------|-------------------|----------------------------|-------------------|----------------------------|-------------------|----------------------------|-------------------|----------------------------|-------------------|-------------------------|------------|------------|------------|------------|------------|
|                             | EBV+<br>(group 1) |                            | EBV+<br>(group 2) |                            | EBV+<br>(group 3) |                            | EBV-<br>(group 4) |                            | EBV-<br>(group 5) |                         |            | 1 vs.<br>5 | 2 vs.<br>5 | 3 vs.<br>5 | 4 vs.<br>5 |
|                             | Mean±SD           | Median<br>(Range)          | Mean±SD           | Median<br>(Range)          | Mean±SD           | Median<br>(Range)          | Mean±SD           | Median<br>(Range)          | Mean±SD           | Median<br>(Range)       |            |            |            |            |            |
| sPD-1                       | 48.26±<br>6.65    | 48.50<br>(37.00-<br>61.30) | 36.70±<br>4.14    | 37.36<br>(30.72-<br>42.51) | 23.11±<br>2.51    | 22.52<br>(19.20-<br>26.97) | 15.53±<br>1.35    | 15.51<br>(13.18-<br>17.94) | 2.88± 1.60        | 3.09<br>(0.11-<br>5.44) | 0.000*     | 0.000*     | 0.000*     | 0.000*     | 0.000*     |
| sPD-L1                      | 32.22±<br>5.35    | 33.38<br>(5.47-<br>37.64)  | 23.03±<br>1.81    | 23.26<br>(20.05-<br>26.43) | 9.52± 0.80        | 9.52<br>(8.18-<br>10.96)   | 5.59± 0.86        | 5.36<br>(4.08-<br>6.94)    | 1.61± 0.83        | 1.69<br>(0.17-<br>2.80) | 0.000*     | 0.000*     | 0.000*     | 0.000*     | 0.000*     |
| sCTLA-4                     | 25.90±<br>2.11    | 26.05<br>(22.14-<br>28.98) | 19.23±<br>3.66    | 18.13<br>(15.44-<br>29.34) | 15.20±<br>3.37    | 14.11<br>(10.15-<br>19.96) | 7.62± 0.82        | 7.57<br>(6.13-<br>8.96)    | 3.19± 1.10        | 2.87<br>(1.49-<br>5.13) | 0.000*     | 0.000*     | 0.000*     | 0.000*     | 0.000*     |
| sCD86                       | 22.78±<br>1.53    | 22.73<br>(20.10-<br>25.95) | 16.97±<br>1.21    | 17.42<br>(15.04-<br>18.60) | 13.72±<br>4.52    | 15.13<br>(4.94-<br>19.71)  | 11.49±<br>0.94    | 11.48<br>(10.00-<br>12.93) | 1.92± 0.65        | 1.82<br>(1.00-<br>2.91) | 0.000*     | 0.000*     | 0.000*     | 0.000*     | 0.000*     |
| sCD200R                     | 38.60±<br>3.82    | 38.35<br>(32.74-<br>44.82) | 27.84±<br>2.00    | 27.39<br>(25.06-<br>30.94) | 22.04±<br>2.85    | 22.21<br>(17.26-<br>26.05) | 12.42±<br>2.80    | 12.58<br>(2.57-<br>15.89)  | 3.69± 1.90        | 3.36<br>(0.09-<br>6.96) | 0.000*     | 0.000*     | 0.000*     | 0.000*     | 0.000*     |
| sCD200                      | 50.50±<br>5.72    | 50.70<br>(41.34-<br>58.99) | 33.82±<br>2.42    | 32.99<br>(30.53-<br>38.65) | 42.62±<br>6.11    | 42.25<br>(33.40-<br>53.82) | 27.62±<br>3.11    | 28.38<br>(22.02-<br>31.85) | 2.59± 1.21        | 2.14<br>(1.04-<br>4.43) | 0.000*     | 0.000*     | 0.000*     | 0.000*     | 0.000*     |

## (A) CLL EBV+

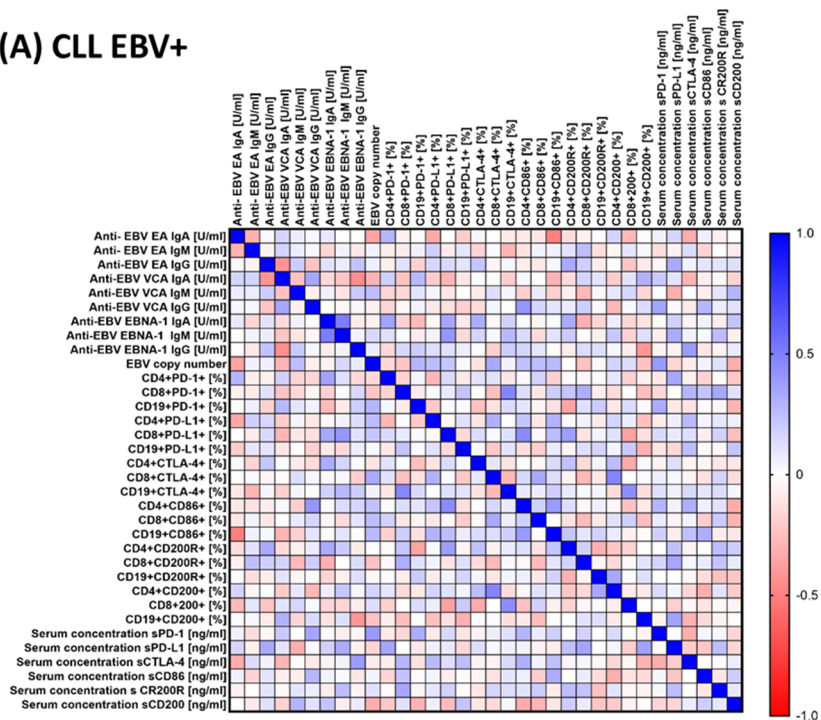

## (B) CLL EBV-

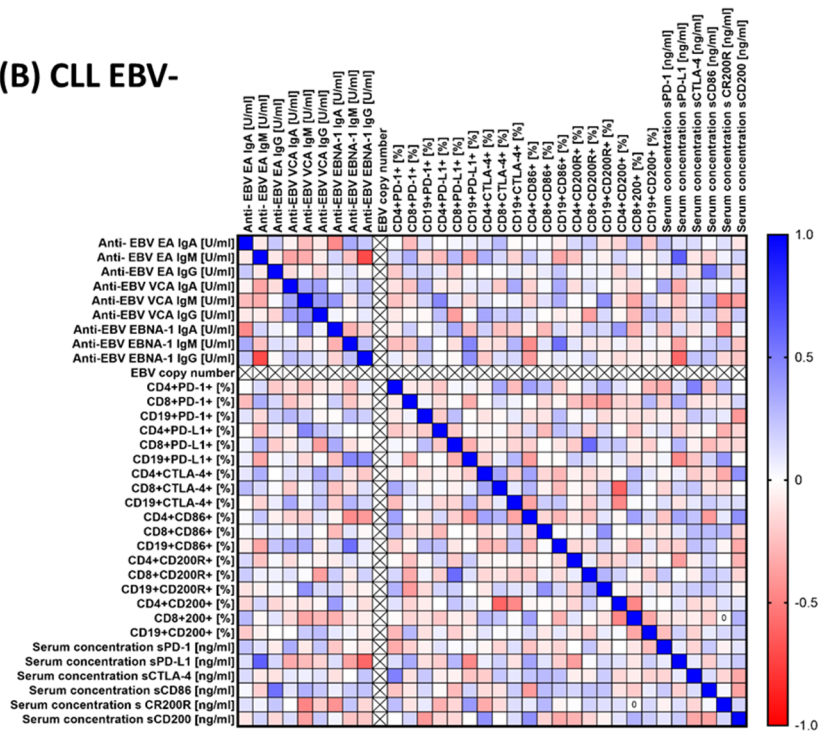

Figure S1. Spearman rank correlation analysis of patients with CLL EBV+ (A) and CLL EBV- (B).

## (A) CVID EBV+

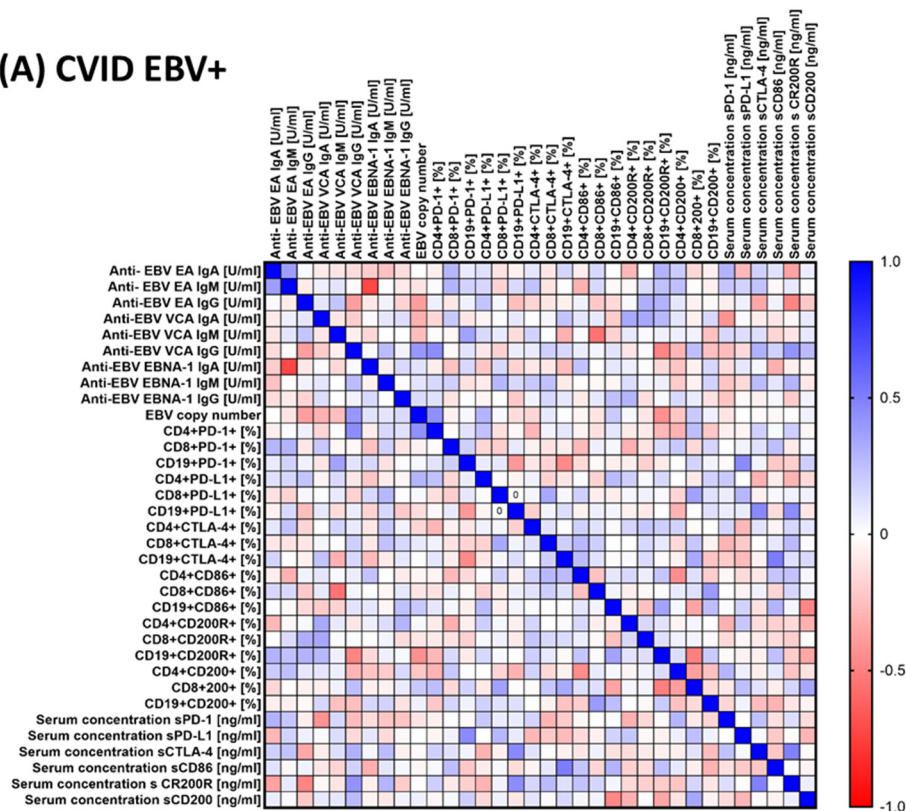

## (B) CVID EBV-

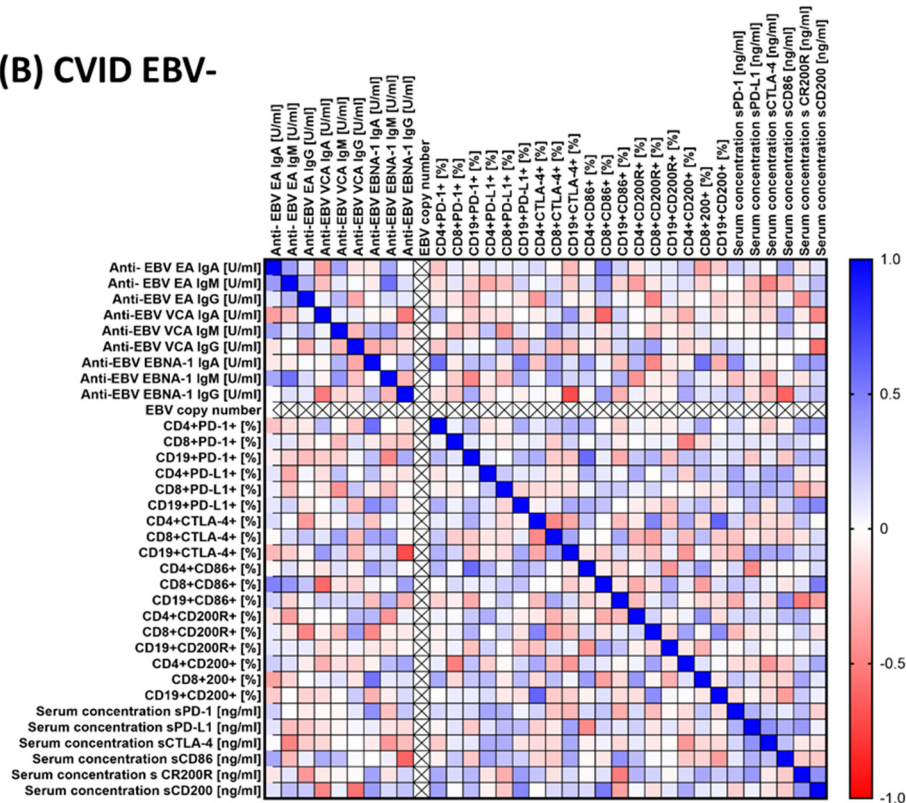

Figure S2. Spearman rank correlation analysis of patients with CVID EBV+ (A) and CVID EBV- (B).

**Table S6.** Sperman rank correlations for CLL EBV+ patients

| Parameters                                            | R<br>Spearman | t(N-2)   | p- value  |
|-------------------------------------------------------|---------------|----------|-----------|
| EA IgA [U/ml] & CD19+CD86+ [%]                        | -0.50029      | -3.3691  | 0.001889* |
| VCA IgA & EBNA IgG [U/ml]                             | -0.446847     | -2.91249 | 0.006293* |
| EA IgG & VCA IgA[U/ml]                                | -0.421622     | -2.71122 | 0.010434* |
| EBNA IgG [U/ml] & CD19+CD200+ [%]                     | -0.407979     | -2.60562 | 0.01351*  |
| CD8+PD-L1+ & CD8+200+ [%]                             | -0.371686     | -2.33453 | 0.025611* |
| EA IgA [U/ml] & EBV copy number                       | -0.364221     | -2.28039 | 0.028975* |
| CD19+PD-1+ & CD4+CD200R+ [%]                          | -0.357662     | -2.23324 | 0.032222* |
| EA IgA [U/ml] & CD4+PD-L1+ [%]                        | -0.342386     | -2.12487 | 0.040947* |
| CD4+CD86+ [%] & Serum concentration sCD200 [ng/ml]    | -0.332068     | -2.05275 | 0.047857* |
| CD4+CTLA-4+ & CD8+200+ [%]                            | -0.331532     | -2.04903 | 0.04824*  |
| EBNA IgM [U/ml] & Serum concentration sPD-L1 [ng/ml]  | 0.329215      | 2.03296  | 0.049923* |
| EBNA IgA [U/ml] & CD4+CD200R+ [%]                     | 0.329472      | 2.03474  | 0.049735* |
| EBV copy number & CD8+CTLA-4+ [%]                     | 0.335436      | 2.0762   | 0.045506* |
| EA IgG[U/ml] & CD4+CD200R+ [%]                        | 0.336852      | 2.08608  | 0.044545* |
| EA IgG [U/ml] & Serum concentration sPD-L1 [ng/ml]    | 0.336937      | 2.08668  | 0.044488* |
| CD8+CTLA-4+ & CD8+CD86+ [%]                           | 0.339383      | 2.10379  | 0.042869* |
| CD19+CD200R+ & CD4+CD200+ [%]                         | 0.341206      | 2.11657  | 0.041694* |
| EBNA IgA & CD8+PD-L1+                                 | 0.341721      | 2.12019  | 0.041367* |
| CD8+PD-1+ [%] & Serum concentration s CD200R+ [%]     | 0.34275       | 2.12743  | 0.040719* |
| VCA IgA & VCA IgG [U/ml]                              | 0.348005      | 2.1645   | 0.037539* |
| CD4+PD-1+ [%] & Serum concentration sPD-L1 [ng/ml]    | 0.348005      | 2.1645   | 0.037539* |
| CD8+CD200R+ [%]& Serum concentration sPD-L1 [ng/ml]   | 0.351609      | 2.19006  | 0.035477* |
| VCA IgG [U/ml] & Serum concentration sPD-1 [ng/ml]    | 0.351866      | 2.19188  | 0.035334* |
| EBNA IgA [U/ml] & CD4+PD-1+ [%]                       | 0.363086      | 2.27221  | 0.029516* |
| CD19+CD200+ [%] & Serum concentration sPD-L1[ng/ml]   | 0.366538      | 2.29714  | 0.027894* |
| CD8+PD-L1+ & CD4+CD200R+ [%]                          | 0.381774      | 2.40854  | 0.021585* |
| EBNA IgG [U/ml] & Serum concentration sCTLA-4 [ng/ml] | 0.385378      | 2.43522  | 0.02028*  |
| CD4+CD86+ & CD19+CD86+ [%]                            | 0.393616      | 2.4967   | 0.017543* |
| EBV copy number & Serum concentration sPD-1 [ng/ml]   | 0.397426      | 2.52538  | 0.016386* |
| EBNA IgM [U/ml] & CD8+PD-L1+ [%]                      | 0.409781      | 2.61944  | 0.013065* |
| VCA IgG [U/ml] & CD4+CD86+ [%]                        | 0.411996      | 2.63648  | 0.012534* |
| CD19+CTLA-4+ & CD8+200+ [%]                           | 0.446676      | 2.91109  | 0.006315* |
| CD8+PD-L1+ & CD4+CD86+ [%]                            | 0.45344       | 2.96648  | 0.005479* |
| CD8+PD-1+ & CD19+CTLA-4+ [%]                          | 0.475798      | 3.15427  | 0.003357* |
| CD8+CTLA-4+ & CD4+CD200+ [%]                          | 0.482139      | 3.20894  | 0.002904* |
| EBNA IgA & EBNA IgM [U/ml]                            | 0.507369      | 3.43315  | 0.001586* |

\* statistically significant results

**Table S7.** Spearman rank correlations for CLL EBV- patients

| Parameters                                            | R<br>Spearman | t(N-2)   | p-value   |
|-------------------------------------------------------|---------------|----------|-----------|
| EA IgM & EBNA IgG [U/ml]                              | -0.71031      | -4.73319 | 0.000101* |
| CD8+CTLA-4+ & CD4+CD200+ [%]                          | -0.60404      | -3.55507 | 0.001773* |
| EBNA IgG [U/ml] & Serum concentration sPD-L1 [ng/ml]  | -0.59391      | -3.46252 | 0.002214* |
| VCA IgM [U/ml] & Serum concentration s CR200R [ng/ml] | -0.47924      | -2.56106 | 0.017814* |
| CD4+CD200+ & CD8+200+ [%]                             | -0.47315      | -2.51906 | 0.019536* |
| CD19+CTLA-4+ & CD4+CD200+ [%]                         | -0.46977      | -2.49597 | 0.020547* |
| EA IgA & EBNA IgA [U/ml]                              | -0.46097      | -2.43645 | 0.023384* |
| CD19+PD-L1+ [%] & Serum concentration sPD-L1 [ng/ml]  | -0.46097      | -2.43645 | 0.023384* |
| EBNA IgM [U/ml]& CD4+CD86+ [%]                        | -0.45271      | -2.38139 | 0.026327* |
| EBNA IgA [U/ml] & Serum concentration sCD200R [ng/ml] | -0.43009      | -2.23455 | 0.035926* |
| CD19+PD-1+ [%] & Serum concentration sCD200 [ng/ml]   | -0.40522      | -2.07897 | 0.049486* |
| VCA IgM & VCA IgG [U/ml]                              | 0.404871      | 2.07684  | 0.0497*   |
| VCA IgM & EBNA IgA[U/ml]                              | 0.411048      | 2.11492  | 0.045998* |
| CD8+CD86+ & CD19+CD200R+ [%]                          | 0.427049      | 2.21519  | 0.037406* |
| VCA IgM [U/ml] & CD19+CD200R+ [%]                     | 0.427919      | 2.22071  | 0.036979* |
| CD4+CTLA-4+[%] & Serum concentration sCD200 [ng/ml]   | 0.429565      | 2.23118  | 0.03618*  |
| CD4+CD86+ [%] & Serum concentration sCD200 [ng/ml]    | 0.431398      | 2.24288  | 0.035306* |
| EBNA IgG [U/ml]& CD19+PD-L1+ [%]                      | 0.431833      | 2.24565  | 0.035101* |
| VCA IgM [U/ml]& CD4+PD-L1+ [%]                        | 0.468363      | 2.48639  | 0.020981* |
| EBNA IgM [U/ml]& CD19+PD-L1+ [%]                      | 0.472711      | 2.51608  | 0.019664* |
| CD4+PD-1+ [%]& Serum concentration sCTLA-4 [ng/ml]    | 0.493043      | 2.65812  | 0.014364* |
| EA IgG [U/ml]& Serum concentration sCD86 [ng/ml]      | 0.558261      | 3.15606  | 0.004582* |
| EBNA IgM [U/ml]& CD19+CD86+ [%]                       | 0.563478      | 3.19919  | 0.00414*  |
| CD8+PD-L1+ & CD8+CD200R+ [%]                          | 0.579073      | 3.33151  | 0.003027* |
| EA IgM [U/ml]& Serum concentration sPD-L1 [ng/ml]     | 0.625054      | 3.75587  | 0.001092* |

\* statistically significant results

**Table S8.** Spearman rank correlations for CVID EBV+ patients

| Parameters                                           | R<br>Spearman | t(N-2)   | p-value   |
|------------------------------------------------------|---------------|----------|-----------|
| EA IgM & EBNA IgA [U/ml]                             | -0.71918      | -5.47701 | 0.000008* |
| VCA IgM [U/ml]& CD8+CD86+ [%]                        | -0.55256      | -3.50807 | 0.001544* |
| CD19+CD200R+ & CD8+200+ [%]                          | -0.50345      | -3.08324 | 0.004567* |
| EA IgG [U/ml] & Serum concentration s CD200R [ng/ml] | -0.48459      | -2.93141 | 0.006651* |
| VCA IgG [U/ml]& CD19+CD200R+ [%]                     | -0.48254      | -2.91519 | 0.006921* |
| CD19+CD86+ [%] & Serum concentration sCD200 [ng/ml]  | -0.47102      | -2.82546 | 0.008609* |
| CD19+PD-1+ & CD19+CTLA-4+ [%]                        | -0.46123      | -2.75065 | 0.010306* |
| CD4+CD86+ & CD4+CD200+ [%]                           | -0.45076      | -2.67207 | 0.012424* |

|                                                                    |          |          |           |
|--------------------------------------------------------------------|----------|----------|-----------|
| EBV copy number& CD19+CD200R+ [%]                                  | -0.43804 | -2.57844 | 0.015475* |
| VCA IgA[U/ml] & Serum concentration sPD-1 [ng/ml]                  | -0.42114 | -2.45693 | 0.020471* |
| CD19+PD-1+ & CD19+PD-L1+ [%]                                       | -0.40783 | -2.36354 | 0.025277* |
| EA IgG & VCA IgG [U/ml]                                            | -0.38421 | -2.20203 | 0.036067* |
| CD4+CD200+ & CD8+200+ [%]                                          | -0.38403 | -2.20082 | 0.036161* |
| EA IgG [U/ml]& EBV copy number                                     | -0.38198 | -2.18709 | 0.037249* |
| EA IgA [U/ml] & Serum concentration sCR200R [ng/ml]                | -0.36689 | -2.08695 | 0.046116* |
| VCA IgM [U/ml] & CD19+PD-1+ [%]                                    | 0.363778 | 2.06652  | 0.04814*  |
| CD8+PD-L1+ & CD8+200+ [%]                                          | 0.36845  | 2.0972   | 0.04513*  |
| EA IgA & EA IgM [U/ml]                                             | 0.384025 | 2.20082  | 0.036161* |
| CD8+CD86+ & CD19+CD200+                                            | 0.394699 | 2.2731   | 0.030889* |
| VCA IgG [U/ml]& EBV copy number                                    | 0.407786 | 2.36322  | 0.025294* |
| VCA IgG [U/ml]& Serum concentration sCR200R [ng/ml]                | 0.423184 | 2.47149  | 0.019802* |
| EBV copy number & CD4+PD-1+ [%]                                    | 0.434038 | 2.54937  | 0.016555* |
| VCA IgG [U/ml] & CD4+PD-1+ [%]                                     | 0.446051 | 2.63716  | 0.013489* |
| CD19+PD-L1+ [%] & Serum concentration s CD200R [ng/ml]             | 0.447213 | 2.64575  | 0.013219* |
| CD19+PD-1+ [%] & Serum concentration sPD-L1 [ng/ml]                | 0.451207 | 2.67538  | 0.012327* |
| CD19+PD-L1+ [%] & Serum concentration sCTLA-4 [ng/ml]              | 0.459399 | 2.73681  | 0.010653* |
| Serum concentration sCTLA-4 & Serum concentration s CD200R [ng/ml] | 0.491267 | 2.98452  | 0.005837* |
| CD19+CTLA-4+ [%]& Serum concentration sCD86 [ng/ml]                | 0.511069 | 3.14625  | 0.0039*   |

\* statistically significant results

**Table S9.** Spearman rank correlations for CVID EBV- patients

| Parameters                                                       | R<br>Spearman | t(N-2)   | p-value  |
|------------------------------------------------------------------|---------------|----------|----------|
| EBNA IgG [U/ml] & CD19+CTLA-4+ [%]                               | -0.70412      | -4.43462 | 0.000255 |
| EBNA IgG [U/ml] & Serum concentration sCD86 [ng/ml]              | -0.60887      | -3.43254 | 0.002636 |
| VCA IgA [U/ml] & CD8+CD86+ [%]                                   | -0.59119      | -3.2781  | 0.003761 |
| VCA IgG [U/ml] & Serum concentration sCD200 [ng/ml]              | -0.55054      | -2.94926 | 0.00793  |
| VCA IgA & EBNA IgG [U/ml]                                        | -0.51553      | -2.69061 | 0.014064 |
| CD19+CD86+ [%] & Serum concentration s CD200R [ng/ml]            | -0.51511      | -2.68763 | 0.014156 |
| CD8+PD-1+ & CD4+CD200+ [%]                                       | -0.50536      | -2.61912 | 0.016432 |
| EA IgM [U/ml] & Serum concentration sCTLA-4 [ng/ml]              | -0.48305      | -2.46721 | 0.02277  |
| VCA IgA [U/ml]& Serum concentration sCD200 [ng/ml]               | -0.47826      | -2.43544 | 0.024357 |
| EA IgG [U/ml] & CD8+CD200R+ [%]                                  | -0.476        | -2.42056 | 0.025135 |
| EBNA IgA [U/ml] & CD8+CD200R+ [%]                                | -0.46923      | -2.37628 | 0.02759  |
| EBNA IgM [U/ml] & CD19+PD-1+ [%]                                 | -0.46923      | -2.37628 | 0.02759  |
| CD4+CTLA-4+ & CD8+CTLA-4+ [%]                                    | -0.46358      | -2.3398  | 0.029778 |
| CD4+CD86+ [%] & Serum concentration sPD-L1 [ng/ml]               | -0.46132      | -2.32531 | 0.030691 |
| Serum concentration sPD-L1 & Serum concentration sCTLA-4 [ng/ml] | 0.424739      | 2.09815  | 0.048798 |
| CD19+CD86+ [%]& Serum concentration sCD86 [ng/ml]                | 0.427563      | 2.11521  | 0.047159 |

|                                                                   |          |         |          |
|-------------------------------------------------------------------|----------|---------|----------|
| Serum concentration s CR200R & Serum concentration sCD200 [ng/ml] | 0.427563 | 2.11521 | 0.047159 |
| EBNA IgA [U/ml]& Serum concentration SPD-1 [ng/ml]                | 0.431959 | 2.14192 | 0.044692 |
| CD8+CD200R+ & CD19+CD200+ [%]                                     | 0.446766 | 2.23327 | 0.037117 |
| EBNA IgA [U/ml] & CD19+PD-L1+ [%]                                 | 0.456804 | 2.2965  | 0.032583 |
| CD19+PD-L1+ [%] & Serum concentration sCD200 [ng/ml]              | 0.472614 | 2.39835 | 0.02634  |
| CD4+CTLA-4+ & CD8+CD200R+ [%]                                     | 0.480519 | 2.45038 | 0.023598 |
| EA IgA [U/ml] & CD8+CD86+ [%]                                     | 0.487295 | 2.4956  | 0.021434 |
| CD8+CD86+[%] & Serum concentration sCD200 [nf/ml]                 | 0.516657 | 2.69865 | 0.013819 |
| EBNA IgA [U/ml] & CD8+200+ [%]                                    | 0.549562 | 2.94178 | 0.008064 |
| EA IgM & EBNA IgM [U/ml]                                          | 0.555775 | 2.98978 | 0.00724  |
| EBNA IgA [U/ml] & CD4+PD-1+ [%]                                   | 0.564088 | 3.05515 | 0.006248 |
| CD19+PD-1+ & CD4+CD86+ [%]                                        | 0.57764  | 3.16466 | 0.004874 |
| CD4+CTLA-4+ & CD19+CD200+ [%]                                     | 0.607173 | 3.4174  | 0.00273  |

---

\* statistically significant results

Table S10. ROC curve analysis

| Parameter        |             | CLL EBV+ vs. CLL<br>EBV- | CLL EBV+ vs. CVID<br>EBV+ | CLL EBV+ vs. HV EBV- | CVID EBV+ vs. CVID<br>EBV- | CVID EBV+ vs. HV<br>EBV- |
|------------------|-------------|--------------------------|---------------------------|----------------------|----------------------------|--------------------------|
| Anti-EBV EA IgA  | AUC         | 1,000                    | 0,809                     | 1,000                | 1,000                      | 1,000                    |
|                  | SE          | 0,000                    | 0,054                     | 0,000                | 0,000                      | 0,000                    |
|                  | -95%        | 1,000                    | 0,704                     | 1,000                | 1,000                      | 1,000                    |
|                  | +95%        | 1,000                    | 0,915                     | 1,000                | 1,000                      | 1,000                    |
|                  | z statistic | -                        | 5,75                      | -                    | -                          | -                        |
|                  | p value     | 0,000                    | 0,000                     | 0,000                | 0,000                      | 0,000                    |
| Anti-EBV EA IgM  | AUC         | 0,631                    | 0,415                     | 0,609                | 0,697                      | 0,679                    |
|                  | SE          | 0,071                    | 0,074                     | 0,071                | 0,079                      | 0,075                    |
|                  | -95%        | 0,492                    | 0,271                     | 0,470                | 0,543                      | 0,531                    |
|                  | +95%        | 0,771                    | 0,560                     | 0,748                | 0,851                      | 0,826                    |
|                  | z statistic | 1,848                    | -1,147                    | 1,538                | 2,502                      | 2,377                    |
|                  | p value     | 0,0646                   | 0,2513                    | 0,124                | 0,012                      | 0,0174                   |
| Anti-EBV EA IgG  | AUC         | 1,000                    | 0,849                     | 1,000                | 1,000                      | 1,000                    |
|                  | SE          | 0,000                    | 0,046                     | 0,000                | 0,000                      | 0,000                    |
|                  | -95%        | 1,000                    | 0,760                     | 1,000                | 1,000                      | 1,000                    |
|                  | +95%        | 1,000                    | 0,938                     | 1,000                | 1,000                      | 1,000                    |
|                  | z statistic | -                        | 7,655                     | -                    | -                          | -                        |
|                  | p value     | 0,000                    | 0,000                     | 0,000                | 0,000                      | 0,000                    |
| Anti-EBV VCA IgA | AUC         | 1,000                    | 0,835                     | 1,000                | 1,000                      | 1,000                    |
|                  | SE          | 0,000                    | 0,049                     | 0,000                | 0,000                      | 0,000                    |
|                  | -95%        | 1,000                    | 0,740                     | 1,000                | 1,000                      | 1,000                    |
|                  | +95%        | 1,000                    | 0,931                     | 1,000                | 1,000                      | 1,000                    |
|                  | z statistic | -                        | 6,871                     | -                    | -                          | -                        |
|                  | p value     | 0,000                    | 0,000                     | 0,000                | 0,000                      | 0,000                    |
| Anti-EBV VCA IgM | AUC         | 1,000                    | 0,590                     | 1,000                | 1,000                      | 1,000                    |
|                  | SE          | 0,000                    | 0,073                     | 0,000                | 0,000                      | 0,000                    |
|                  | -95%        | 1,000                    | 0,446                     | 1,000                | 1,000                      | 1,000                    |
|                  | +95%        | 1,000                    | 0,733                     | 1,000                | 1,000                      | 1,000                    |
|                  | z statistic | -                        | 1,228                     | -                    | -                          | -                        |
|                  | p value     | 0,000                    | 0,219                     | 0,000                | 0,000                      | 0,000                    |
| Anti-EBV VCA IgG | AUC         | 0,979                    | 0,886                     | 1,000                | 0,645                      | 0,971                    |
|                  | SE          | 0,015                    | 0,04                      | 0,000                | 0,077                      | 0,017                    |
|                  | -95%        | 0,951                    | 0,808                     | 1,000                | 0,494                      | 0,937                    |
|                  | +95%        | 1,00                     | 0,964                     | 1,000                | 0,797                      | 1,00                     |
|                  | z statistic | 32,871                   | 9,67                      | -                    | 1,883                      | 27,326                   |
|                  | p value     | 0,000                    | 0,000                     | 0,000                | 0,0597                     | 0,000                    |

|                     |             |        |        |        |        |       |
|---------------------|-------------|--------|--------|--------|--------|-------|
| Anti-EBV EBNA-1 IgA | AUC         | 1,000  | 0,877  | 1,000  | 1,000  | 1,000 |
|                     | SE          | 0,000  | 0,041  | 0,000  | 0,000  | 0,000 |
|                     | -95%        | 1,000  | 0,797  | 1,000  | 1,000  | 1,000 |
|                     | +95%        | 1,000  | 0,957  | 1,000  | 1,000  | 1,000 |
|                     | z statistic | -      | 9,230  | -      | -      | -     |
|                     | p value     | 0,000  | 0,000  | 0,000  | 0,000  | 0,000 |
| Anti-EBV EBNA-1 IgM | AUC         | 0,754  | 0,577  | 0,894  | 0,867  | 0,739 |
|                     | SE          | 0,061  | 0,075  | 0,037  | 0,05   | 0,067 |
|                     | -95%        | 0,634  | 0,429  | 0,820  | 0,769  | 0,608 |
|                     | +95%        | 0,874  | 0,724  | 0,967  | 0,966  | 0,870 |
|                     | z statistic | 4,148  | 1,020  | 10,560 | 7,336  | 3,583 |
|                     | p value     | 0,000  | 0,307  | 0,000  | 0,000  | 0,003 |
| Anti-EBV EBNA-1 IgG | AUC         | 1,000  | 0,594  | 1,000  | 1,000  | 1,000 |
|                     | SE          | 0,000  | 0,072  | 0,000  | 0,000  | 0,000 |
|                     | -95%        | 1,000  | 0,452  | 1,000  | 1,000  | 1,000 |
|                     | +95%        | 1,000  | 0,735  | 1,000  | 1,000  | 1,000 |
|                     | z statistic | -      | 1,299  | -      | -      | -     |
|                     | p value     | 0,000  | 0,193  | 0,000  | 0,000  | 0,000 |
| CD4+PD-1+[%]        | AUC         | 1,000  | 0,908  | 1,000  | 0,965  | 1,000 |
|                     | SE          | 0,000  | 0,037  | 0,000  | 0,021  | 0,000 |
|                     | -95%        | 1,000  | 0,835  | 1,000  | 0,924  | 1,000 |
|                     | +95%        | 1,000  | 0,982  | 1,000  | 1,000  | 1,000 |
|                     | z statistic | -      | 10,900 | -      | 22,398 | -     |
|                     | p value     | 0,000  | 0,000  | 0,000  | 0,000  | 0,000 |
| CD8+PD-1+[%]        | AUC         | 1,000  | 0,250  | 1,000  | 1,000  | 1,000 |
|                     | SE          | 0,000  | 0,06   | 0,000  | 0,000  | 0,000 |
|                     | -95%        | 1,000  | 0,132  | 1,000  | 1,000  | 1,000 |
|                     | +95%        | 1,000  | 0,369  | 1,000  | 1,000  | 1,000 |
|                     | z statistic | -      | -4,125 | -      | -      | -     |
|                     | p value     | 0,000  | 0,000  | 0,000  | 0,000  | 0,000 |
| CD19+PD-1+[%]       | AUC         | 0,986  | 0,978  | 1,000  | 1,000  | 1,000 |
|                     | SE          | 0,011  | 0,014  | 0,000  | 0,000  | 0,000 |
|                     | -95%        | 0,964  | 0,951  | 1,000  | 1,000  | 1,000 |
|                     | +95%        | 1,000  | 1,000  | 1,000  | 1,000  | 1,000 |
|                     | z statistic | 43,047 | 34,353 | -      | -      | -     |
|                     | p value     | 0,000  | 0,000  | 0,000  | 0,000  | 0,000 |
| CD4+PD-L1+[%]       | AUC         | 1,000  | 0,942  | 1,000  | 1,000  | 1,000 |
|                     | SE          | 0,000  | 0,025  | 0,000  | 0,000  | 0,000 |
|                     | -95%        | 1,000  | 0,893  | 1,000  | 1,000  | 1,000 |
|                     | +95%        | 1,000  | 0,992  | 1,000  | 1,000  | 1,000 |
|                     | z statistic | -      | 17,524 | -      | -      | -     |

|                 |             |       |        |       |       |       |
|-----------------|-------------|-------|--------|-------|-------|-------|
|                 | p value     | 0,000 | 0,000  | 0,000 | 0,000 | 0,000 |
|                 | AUC         | 1,000 | 0,770  | 1,000 | 1,000 | 1,000 |
|                 | SE          | 0,000 | 0,058  | 0,000 | 0,000 | 0,000 |
| CD8+PD-L1+[%]   | -95%        | 1,000 | 0,657  | 1,000 | 1,000 | 1,000 |
|                 | +95%        | 1,000 | 0,884  | 1,000 | 1,000 | 1,000 |
|                 | z statistic | -     | 4,669  | -     | -     | -     |
|                 | p value     | 0,000 | 0,000  | 0,000 | 0,000 | 0,000 |
|                 | AUC         | 1,000 | 0,816  | 1,000 | 1,000 | 1,000 |
|                 | SE          | 0,000 | 0,051  | 0,000 | 0,000 | 0,000 |
| CD19+PD-L1+[%]  | -95%        | 1,000 | 0,716  | 1,000 | 1,000 | 1,000 |
|                 | +95%        | 1,000 | 0,916  | 1,000 | 1,000 | 1,000 |
|                 | z statistic | -     | 6,209  | -     | -     | -     |
|                 | p value     | 0,000 | 0,000  | 0,000 | 0,000 | 0,000 |
|                 | AUC         | 1,000 | 0,839  | 1,000 | 1,000 | 1,000 |
|                 | SE          | 0,000 | 0,047  | 0,000 | 0,000 | 0,000 |
| CD4+CTLA-4+[%]  | -95%        | 1,000 | 0,746  | 1,000 | 1,000 | 1,000 |
|                 | +95%        | 1,000 | 0,931  | 1,000 | 1,000 | 1,000 |
|                 | z statistic | -     | 7,177  | -     | -     | -     |
|                 | p value     | 0,000 | 0,000  | 0,000 | 0,000 | 0,000 |
|                 | AUC         | 1,000 | 0,255  | 1,000 | 1,000 | 1,000 |
|                 | SE          | 0,000 | 0,067  | 0,000 | 0,000 | 0,000 |
| CD8+CTLA-4+[%]  | -95%        | 1,000 | 0,123  | 1,000 | 1,000 | 1,000 |
|                 | +95%        | 1,000 | 0,386  | 1,000 | 1,000 | 1,000 |
|                 | z statistic | -     | -3,657 | -     | -     | -     |
|                 | p value     | 0,000 | 0,0003 | 0,000 | 0,000 | 0,000 |
|                 | AUC         | 1,000 | 0,000  | 1,000 | 1,000 | 1,000 |
|                 | SE          | 0,000 | 0,000  | 0,000 | 0,000 | 0,000 |
| CD19+CTLA-4+[%] | -95%        | 1,000 | 0,000  | 1,000 | 1,000 | 1,000 |
|                 | +95%        | 1,000 | 0,0000 | 1,000 | 1,000 | 1,000 |
|                 | z statistic | -     | -      | -     | -     | -     |
|                 | p value     | 0,000 | 0,000  | 0,000 | 0,000 | 0,000 |
|                 | AUC         | 1,000 | 0,826  | 1,000 | 1,000 | 1,000 |
|                 | SE          | 0,000 | 0,049  | 0,000 | 0,000 | 0,000 |
| CD4+CD86+[%]    | -95%        | 1,000 | 0,730  | 1,000 | 1,000 | 1,000 |
|                 | +95%        | 1,000 | 0,923  | 1,000 | 1,000 | 1,000 |
|                 | z statistic | -     | 6,623  | -     | -     | -     |
|                 | p value     | 0,000 | 0,000  | 0,000 | 0,000 | 0,000 |
|                 | AUC         | 0,939 | 0,833  | 1,000 | 1,000 | 1,000 |
|                 | SE          | 0,028 | 0,053  | 0,000 | 0,000 | 0,000 |
| CD8+CD86+[%]    | -95%        | 0,884 | 0,730  | 1,000 | 1,000 | 1,000 |
|                 | +95%        | 0,995 | 0,936  | 1,000 | 1,000 | 1,000 |

|                 |             |       |        |       |       |        |
|-----------------|-------------|-------|--------|-------|-------|--------|
|                 | z statistic | 15,46 | 6,334  | -     | -     | -      |
|                 | p value     | 0,000 | 0,000  | 0,000 | 0,000 | 0,000  |
| CD19+CD86+[%]   | AUC         | 1,000 | 1,000  | 1,000 | 1,000 | 1,000  |
|                 | SE          | 0,000 | 0,000  | 0,000 | 0,000 | 0,000  |
|                 | -95%        | 1,000 | 1,000  | 1,000 | 1,000 | 1,000  |
|                 | +95%        | 1,000 | 1,000  | 1,000 | 1,000 | 1,000  |
|                 | z statistic | -     | -      | -     | -     | -      |
|                 | p value     | 0,000 | 0,000  | 0,000 | 0,000 | 0,000  |
| CD4+CD200R+[%]  | AUC         | 1,000 | 0,991  | 1,000 | 1,000 | 0,934  |
|                 | SE          | 0,000 | 0,0007 | 0,000 | 0,000 | 0,029  |
|                 | -95%        | 1,000 | 0,977  | 1,000 | 1,000 | 0,877  |
|                 | +95%        | 1,000 | 1,000  | 1,000 | 1,000 | 0,992  |
|                 | z statistic | -     | 68,498 | -     | -     | 14,894 |
|                 | p value     | 0,000 | 0,000  | 0,000 | 0,000 | 0,000  |
| CD8+CD200R+[%]  | AUC         | 1,000 | 0,814  | 1,000 | 1,000 | 1,000  |
|                 | SE          | 0,000 | 0,052  | 0,000 | 0,000 | 0,000  |
|                 | -95%        | 1,000 | 0,711  | 1,000 | 1,000 | 1,000  |
|                 | +95%        | 1,000 | 0,916  | 1,000 | 1,000 | 1,000  |
|                 | z statistic | -     | 6,007  | -     | -     | -      |
|                 | p value     | 0,000 | 0,000  | 0,000 | 0,000 | 0,000  |
| CD19+CD200R+[%] | AUC         | 1,000 | 0,809  | 0,519 | 1,000 | 0,238  |
|                 | SE          | 0,000 | 0,053  | 0,073 | 0,000 | 0,063  |
|                 | -95%        | 1,000 | 0,705  | 0,375 | 1,000 | 0,115  |
|                 | +95%        | 1,000 | 0,914  | 0,662 | 1,000 | 0,362  |
|                 | z statistic | -     | 5,801  | 0,252 | -     | -4,144 |
|                 | p value     | 0,000 | 0,000  | 0,800 | 0,000 | 0,000  |
| CD4+CD200+[%]   | AUC         | 1,000 | 0,984  | 1,000 | 1,000 | 1,000  |
|                 | SE          | 0,000 | 0,011  | 0,000 | 0,000 | 0,000  |
|                 | -95%        | 1,000 | 0,963  | 1,000 | 1,000 | 1,000  |
|                 | +95%        | 1,000 | 1,000  | 1,000 | 1,000 | 1,000  |
|                 | z statistic | -     | 44,950 | -     | -     | -      |
|                 | p value     | 0,000 | 0,000  | 0,000 | 0,000 | 0,000  |
| CD8+CD200+[%]   | AUC         | 1,000 | 0,587  | 1,000 | 1,000 | 1,000  |
|                 | SE          | 0,000 | 0,077  | 0,000 | 0,000 | 0,000  |
|                 | -95%        | 1,000 | 0,436  | 1,000 | 1,000 | 1,000  |
|                 | +95%        | 1,000 | 0,737  | 1,000 | 1,000 | 1,000  |
|                 | z statistic | -     | 1,125  | -     | -     | -      |
|                 | p value     | 0,000 | 0,260  | 0,000 | 0,000 | 0,000  |
| CD19+CD200+[%]  | AUC         | 1,000 | 0,907  | 1,000 | 0,916 | 0,853  |
|                 | SE          | 0,000 | 0,04   | 0,000 | 0,037 | 0,048  |
|                 | -95%        | 1,000 | 0,828  | 1,000 | 0,843 | 0,760  |

|                             |             |        |        |       |        |       |
|-----------------------------|-------------|--------|--------|-------|--------|-------|
|                             | +95%        | 1,000  | 0,986  | 1,000 | 0,989  | 0,946 |
|                             | z statistic | -      | 10,107 | -     | 11,176 | 7,438 |
|                             | p value     | 0,000  | 0,000  | 0,000 | 0,000  | 0,000 |
| Serum concentration sPD-1   | AUC         | 0,917  | 1,000  | 1,000 | 1,000  | 1,000 |
|                             | SE          | 0,034  | 0,000  | 0,000 | 0,000  | 0,000 |
|                             | -95%        | 0,850  | 1,000  | 1,000 | 1,000  | 1,000 |
|                             | +95%        | 0,983  | 1,000  | 1,000 | 1,000  | 1,000 |
|                             | z statistic | 12,334 | -      | -     | -      | -     |
|                             | p value     | 0,000  | 0,000  | 0,000 | 0,000  | 0,000 |
|                             | AUC         | 0,972  | 0,972  | 1,000 | 1,000  | 1,000 |
| Serum concentration sPD-L1  | SE          | 0,027  | 0,027  | 0,000 | 0,000  | 0,000 |
|                             | -95%        | 0,919  | 0,919  | 1,000 | 1,000  | 1,000 |
|                             | +95%        | 1,000  | 1,000  | 1,000 | 1,000  | 1,000 |
|                             | z statistic | 17,241 | 17,241 | -     | -      | -     |
|                             | p value     | 0,000  | 0,000  | 0,000 | 0,000  | 0,000 |
|                             | AUC         | 0,898  | 1,000  | 1,000 | 1,000  | 1,000 |
|                             | SE          | 0,051  | 0,000  | 0,000 | 0,000  | 0,000 |
| Serum concentration sCTLA-4 | -95%        | 0,797  | 1,000  | 1,000 | 1,000  | 1,000 |
|                             | +95%        | 0,999  | 1,000  | 1,000 | 1,000  | 1,000 |
|                             | z statistic | 7,735  | -      | -     | -      | -     |
|                             | p value     | 0,000  | 0,000  | 0,000 | 0,000  | 0,000 |
|                             | AUC         | 1,000  | 1,000  | 1,000 | 0,700  | 1,000 |
|                             | SE          | 0,000  | 0,000  | 0,000 | 0,078  | 0,000 |
|                             | -95%        | 1,000  | 1,000  | 1,000 | 0,546  | 1,000 |
| Serum concentration sCD86   | +95%        | 1,000  | 1,000  | 1,000 | 0,854  | 1,000 |
|                             | z statistic | -      | -      | -     | 2,55   | -     |
|                             | p value     | 0,000  | 0,000  | 0,000 | 0,011  | 0,000 |
|                             | AUC         | 1,000  | 1,000  | 1,000 | 1,000  | 1,000 |
|                             | SE          | 0,000  | 0,000  | 0,000 | 0,000  | 0,000 |
|                             | -95%        | 1,000  | 1,000  | 1,000 | 1,000  | 1,000 |
|                             | +95%        | 1,000  | 1,000  | 1,000 | 1,000  | 1,000 |
| Serum concentration sCD200R | z statistic | -      | -      | -     | -      | -     |
|                             | p value     | 0,000  | 0,000  | 0,000 | 0,000  | 0,000 |
|                             | AUC         | 1,000  | 0,811  | 1,000 | 1,000  | 1,000 |
|                             | SE          | 0,000  | 0,051  | 0,000 | 0,000  | 0,000 |
|                             | -95%        | 1,000  | 0,711  | 1,000 | 1,000  | 1,000 |
|                             | +95%        | 1,000  | 0,912  | 1,000 | 1,000  | 1,000 |
|                             | z statistic | -      | 6,073  | -     | -      | -     |
| Serum concentration sCD200  | p value     | 0,000  | 0,000  | 0,000 | 0,000  | 0,000 |
